# Supplementary material for: Hydroquinine Inhibits the Growth of Multidrug-Resistant Pseudomonas aeruginosa via the Suppression of the Arginine Deiminase Pathway Genes
Source: MDPI journal article supplement (doi:10.3390/ijms241813914), 2023-09-10
Supplement: s1 [file s1]

## Supplementary Materials

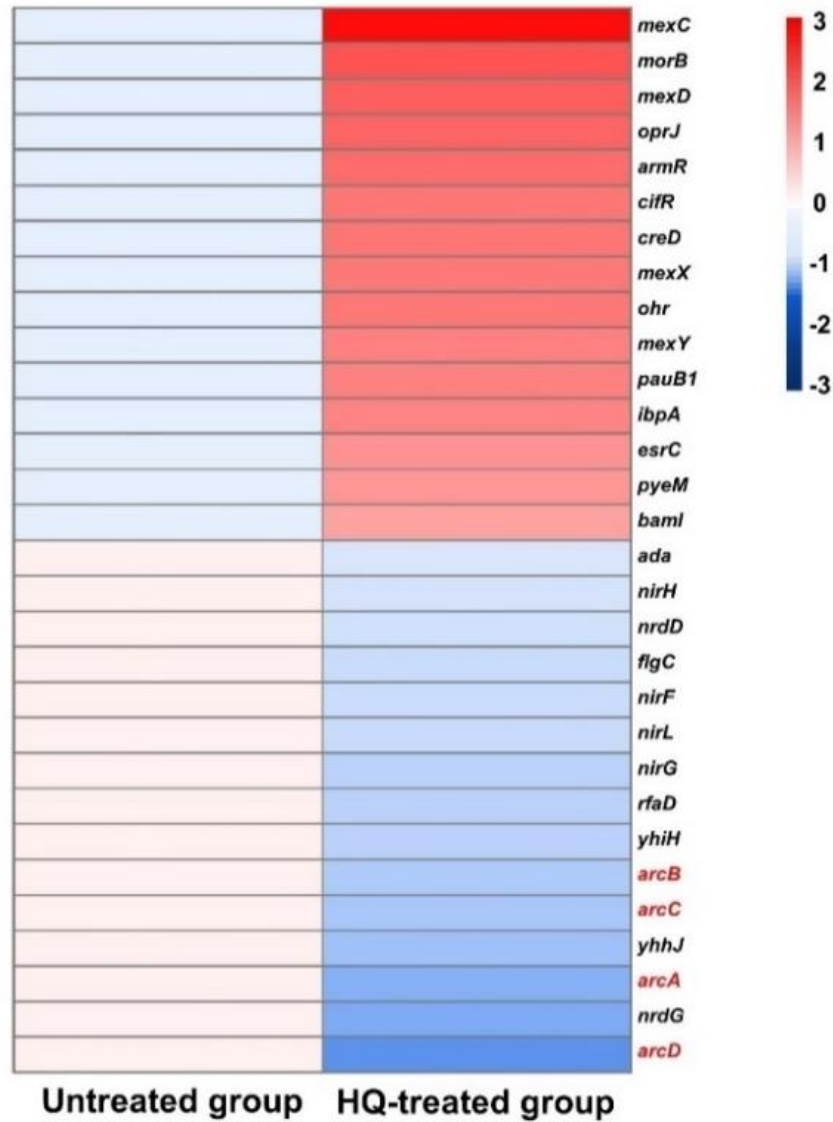

**Figure S1.** Gene expression heatmap of *P. aeruginosa* ATCC 27853 in response to hydroquinone (1.25 mg/mL). The map shows the top 15 transcripts of the significantly up- and down-regulated DEGs (hypothetical protein and undefined genes were excluded).

**Table S1.** Differentially expressed genes (DEGs) associated with the ADI pathway as determined by transcriptome analysis.

| Gene name   | Gene product                        | Product name | Log <sub>2</sub> FC <sup>1</sup> | FDR <sup>2</sup>        | <i>p</i> -value         |
|-------------|-------------------------------------|--------------|----------------------------------|-------------------------|-------------------------|
| <i>arcA</i> | Arginine deiminase (ADI)            | ADI          | -3.85                            | 2.06 × 10 <sup>-5</sup> | 1.43 × 10 <sup>-7</sup> |
| <i>arcB</i> | Ornithine transcarbamylase (OTC)    | OTC          | -3.32                            | 4.00 × 10 <sup>-4</sup> | 3.36 × 10 <sup>-6</sup> |
| <i>arcC</i> | Carbamate kinase (CK)               | CK           | -3.41                            | 2.00 × 10 <sup>-4</sup> | 1.96 × 10 <sup>-6</sup> |
| <i>arcD</i> | Arginine/ornithine antiporter (AOA) | AOA          | -4.24                            | 2.51 × 10 <sup>-6</sup> | 1.22 × 10 <sup>-8</sup> |

<sup>1</sup>Log<sub>2</sub> FC, Log<sub>2</sub> relative fold changes of the gene expression levels in response to hydroquinine, compared to the untreated control. <sup>2</sup>FDR, false discovery rate showed statistical significances.
